# Supplementary material
Source: HighWire-hosted journal article supplement (http://www.annfammed.org/highwire/filestream/644/field_highwire_adjunct_files/0/Willard-Grace_Supp_Apps.pdf)
Supplement: Willard-Grace_Supp_Apps.pdf [file Willard-Grace_Supp_Apps.pdf]

**Supplemental materials for:**

Willard-Grace R, Knox M, Huang B, Hammer H, Kivlahan C, Grumbach K. Burnout and health care workforce turnover. *Ann Fam Med*. 2019;17(1):36-41.

**Supplemental Appendix A.** Results of multivariate regression model of “burnout” and co-  
variates as predictors of turnover for clinicians, adjusted for clustering by clinic (n=244)

|                                                                         | <b>Adjusted<br/>odds ratio</b> | <b>Robust<br/>standard<br/>error</b> | <b>95% CI</b>      | <b>p-<br/>value</b> |
|-------------------------------------------------------------------------|--------------------------------|--------------------------------------|--------------------|---------------------|
| <b>Burned out</b>                                                       | <b>1.57</b>                    | <b>0.34</b>                          | <b>1.02 - 2.40</b> | <b>0.04</b>         |
|                                                                         |                                |                                      |                    |                     |
| <u>Covariates:</u>                                                      |                                |                                      |                    |                     |
| Number of half days of clinic per<br>week (ref. 1-2 half days per week) |                                |                                      |                    |                     |
| 3-5 half days per week                                                  | 0.64                           | 0.25                                 | 0.29 - 1.39        | 0.26                |
| 6 or more half days per week                                            | 0.89                           | 0.46                                 | 0.33 – 2.45        | 0.83                |
| Tenure (ref. less than 1 year)                                          |                                |                                      |                    |                     |
| 1-5 years                                                               | 0.79                           | 0.33                                 | 0.35 – 1.78        | 0.57                |
| <b>More than 5 years</b>                                                | <b>0.32</b>                    | <b>0.14</b>                          | <b>0.14 - 0.74</b> | <b>0.007</b>        |
| University system (versus county-<br>based)                             | 0.81                           | 0.29                                 | 0.41 - 1.62        | 0.56                |
| 3 year interval between survey and<br>roster (versus 2 years)           | 1.21                           | 0.35                                 | 0.69 – 2.13        | 0.51                |
| <b>Hosmer-Lemeshow chi2 p=0.67</b>                                      |                                |                                      |                    |                     |

**Supplemental Appendix B.** Results of multivariate regression model of “burnout” and co-  
variates as predictors of turnover for staff, adjusted for clustering by clinic (n=468)

|                                                                       | <b>Adjusted<br/>odds ratio</b> | <b>Robust<br/>standard<br/>error</b> | <b>95% CI</b>      | <b>p-<br/>value</b> |
|-----------------------------------------------------------------------|--------------------------------|--------------------------------------|--------------------|---------------------|
| Burned out                                                            | 1.09                           | 0.28                                 | 0.66 – 1.82        | 0.73                |
|                                                                       |                                |                                      |                    |                     |
| <u>Covariates:</u>                                                    |                                |                                      |                    |                     |
| <b>Full-time position (versus part-<br/>time)</b>                     | <b>0.51</b>                    | <b>0.18</b>                          | <b>0.25 – 1.01</b> | <b>0.05</b>         |
| Tenure (ref. less than 1 year)                                        |                                |                                      |                    |                     |
| 1-5 years                                                             | 0.83                           | 0.21                                 | 0.51 – 1.36        | 0.47                |
| <b>More than 5 years</b>                                              | <b>0.52</b>                    | <b>0.14</b>                          | <b>0.30 - 0.89</b> | <b>0.02</b>         |
| <b>University system (versus county-<br/>based)</b>                   | <b>0.61</b>                    | <b>0.08</b>                          | <b>0.47 - 0.78</b> | <b>&lt;0.001</b>    |
| <b>3 year interval between survey and<br/>roster (versus 2 years)</b> | <b>1.76</b>                    | <b>0.42</b>                          | <b>1.10 – 2.82</b> | <b>0.02</b>         |
| <b>Hosmer-Lemeshow chi2 p=0.52</b>                                    |                                |                                      |                    |                     |

| <b>Supplemental Appendix C.</b> Results of multivariate regression model of “Employee engagement” and co-variates as predictors of turnover for clinicians, adjusted for clustering by clinic (n=242) |                            |                              |                    |                |
|-------------------------------------------------------------------------------------------------------------------------------------------------------------------------------------------------------|----------------------------|------------------------------|--------------------|----------------|
|                                                                                                                                                                                                       | <b>Adjusted odds ratio</b> | <b>Robust standard error</b> | <b>95% CI</b>      | <b>p-value</b> |
| High employee engagement                                                                                                                                                                              | 0.58                       | 0.17                         | 0.33 – 1.04        | 0.07           |
| <u>Covariates:</u>                                                                                                                                                                                    |                            |                              |                    |                |
| Number of half days of clinic per week (ref. 1-2 half days per week)                                                                                                                                  |                            |                              |                    |                |
| 3-5 half days per week                                                                                                                                                                                | 0.65                       | 0.26                         | 0.30 – 1.41        | 0.28           |
| 6 or more half days per week                                                                                                                                                                          | 1.09                       | 0.59                         | 0.38 – 3.13        | 0.88           |
| Tenure (ref. less than 1 year)                                                                                                                                                                        |                            |                              |                    |                |
| 1-5 years                                                                                                                                                                                             | 0.80                       | 0.35                         | 0.35 – 1.87        | 0.61           |
| <b>More than 5 years</b>                                                                                                                                                                              | <b>0.34</b>                | <b>0.14</b>                  | <b>0.15 - 0.75</b> | <b>0.01</b>    |
| University system (versus county-based)                                                                                                                                                               | 0.78                       | 0.30                         | 0.36 – 1.67        | 0.51           |
| 3 year interval between survey and roster (versus 2 years)                                                                                                                                            | 1.24                       | 0.29                         | 0.79 – 1.96        | 0.35           |
| <b>Hosmer-Lemeshow chi2 p=0.06</b>                                                                                                                                                                    |                            |                              |                    |                |

|                                                                                                                                                                                                  |                            |                              |                    |                 |
|--------------------------------------------------------------------------------------------------------------------------------------------------------------------------------------------------|----------------------------|------------------------------|--------------------|-----------------|
| <b>Supplemental Appendix D.</b> Results of multivariate regression model of “Employee engagement” and co-variates as predictors of turnover for staff, adjusted for clustering by clinic (n=464) |                            |                              |                    |                 |
|                                                                                                                                                                                                  | <b>Adjusted odds ratio</b> | <b>Robust standard error</b> | <b>95% CI</b>      | <b>p-value</b>  |
| High employee engagement                                                                                                                                                                         | 0.99                       | 0.28                         | 0.57 – 1.71        | 0.96            |
| <u>Covariates:</u>                                                                                                                                                                               |                            |                              |                    |                 |
| <b>Full-time position (versus part-time)</b>                                                                                                                                                     | <b>0.48</b>                | <b>0.17</b>                  | <b>0.23 - 0.98</b> | <b>0.04</b>     |
| Tenure (ref. less than 1 year)                                                                                                                                                                   |                            |                              |                    |                 |
| 1-5 years                                                                                                                                                                                        | 0.83                       | 0.21                         | 0.50 – 1.37        | 0.46            |
| <b>More than 5 years</b>                                                                                                                                                                         | <b>0.55</b>                | <b>0.15</b>                  | <b>0.31 - 0.95</b> | <b>0.03</b>     |
| <b>University system (versus county-based)</b>                                                                                                                                                   | <b>0.59</b>                | <b>0.08</b>                  | <b>0.45 - 0.76</b> | <b>&lt;.001</b> |
| <b>3 year interval between survey and roster (versus 2 years)</b>                                                                                                                                | <b>1.77</b>                | <b>0.44</b>                  | <b>1.08 - 2.90</b> | <b>0.02</b>     |
| <b>Hosmer-Lemeshow chi2 p=0.15</b>                                                                                                                                                               |                            |                              |                    |                 |
